# Supplementary material for: Brain-first forms of Parkinson’s Disease are over-represented in patients with non-responsive resting tremor
Source: bioRxiv or medRxiv preprint supplement (doi:10.1101/2024.07.23.24310859), 2024-07-24
Supplement: Supplementary file [file media-1.pdf]

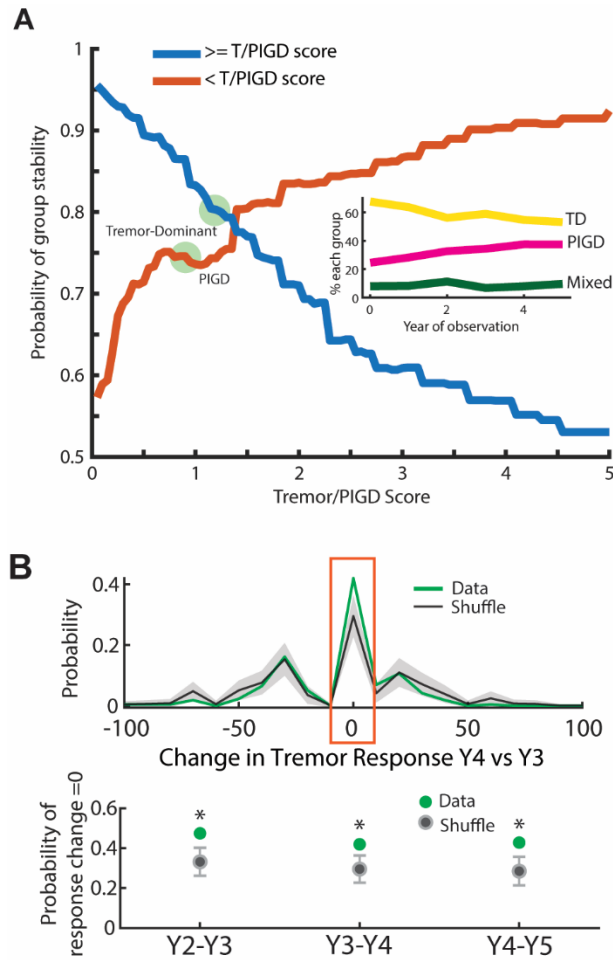

**Supplementary Figure 1** – A) Simulation of stability results for different thresholds of Tremor/PIGD score in the definition of Tremor-Dominant & PIGD scores. Circles: Criteria typically used. Changing thresholds will change stability, but with significant changes in the number of patients included in each group. Inset: Percentage of subjects classified in each category. A decrease in TD patients is accompanied by a progressive increase in the PIGD classification. B) Top: Distribution of the differences in the individual probability of responses between Y4 and Y3 and shuffle control. Bottom: Probability of no change in therapeutic response is significantly higher than randomly expected across timepoints. Black line represents the average of simulated sham distributions and shaded area represents the 95% Confidence Interval of this distribution. \*  $p < 0.05$  vs. shuffle

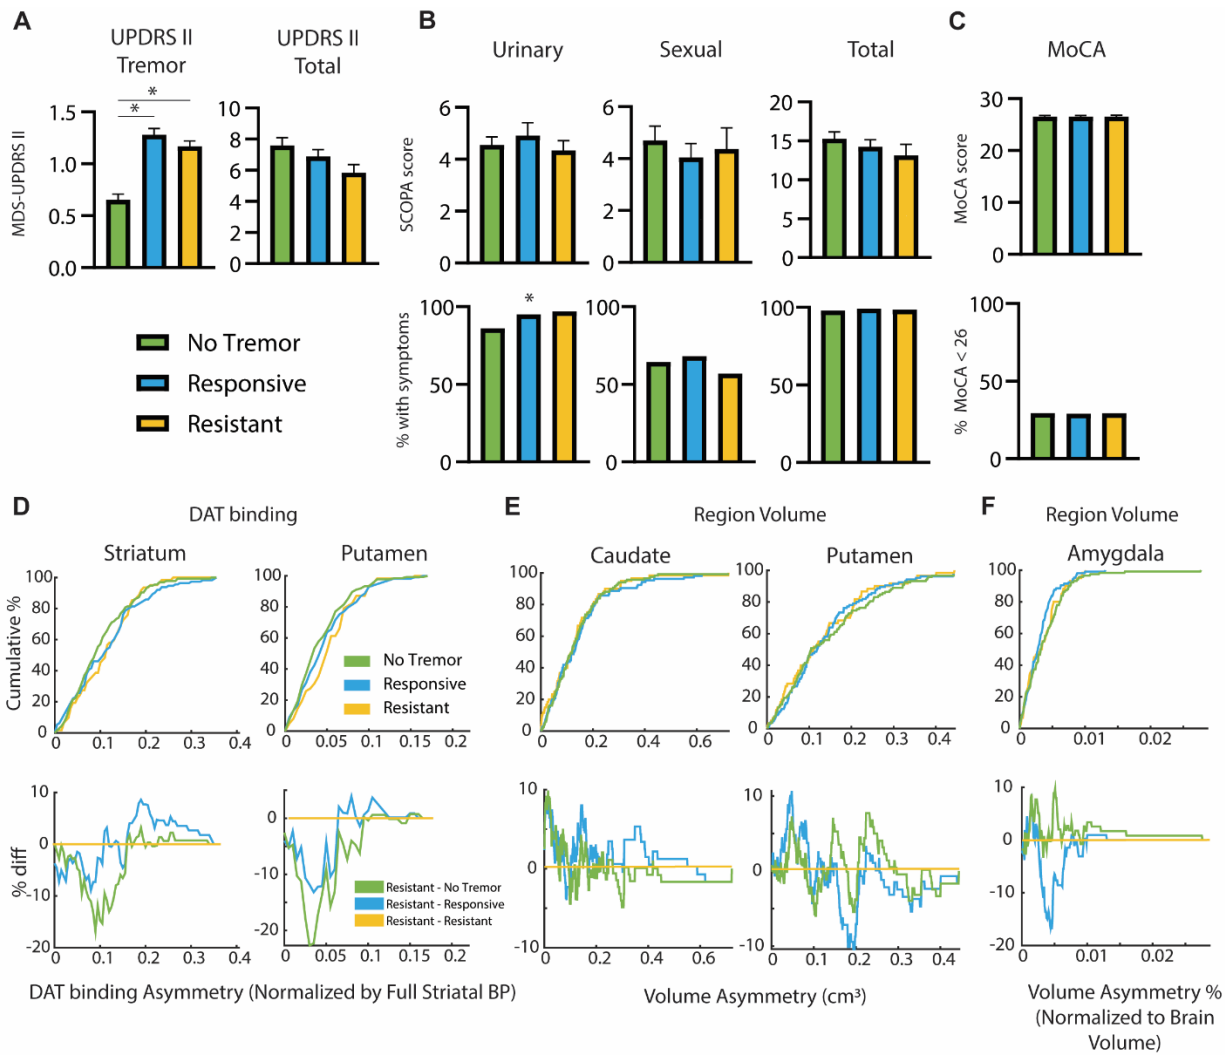

**Supplementary Figure 2** – A) MDS-UPDRS Part II Scores; Tremor – Kruskal Wallis,  $F(2,331)=64.58$ ,  $p<0.001$ , post-hoc: No tremor vs. Improvement:  $p<0.001$ ; No tremor vs. resistant  $p<0.001$ ; Improvement vs. persistent:  $p=0.5604$ ; MDS-UPDRS Part II Total: – Kruskal Wallis,  $F(2,330)=3.483$ ,  $p=0.1752$ ; B) Top: SCOPA score for each symptom domain. Urinary – Kruskal Wallis  $F(2,330)=0.1773$ ,  $p=0.9164$ ; Sexual – Kruskal Wallis  $F(2,330)=0.5651$ ,  $p=0.7539$ ; Total – Kruskal Wallis  $F(2,330)=3.865$ ,  $p=0.1448$ ; Bottom: % of patients with SCOPA subdomains score > 1 Urinary – Fisher Exact Test,  $p=0.0083$ ; Sexual – Chi-Squared=2.279,  $p=0.3199$ ; Total – Fisher Exact Test  $p>0.999$ ; C) Top: MOCA score - Kruskal Wallis  $F(2,329)=0.7783$ ,  $p=0.6776$ , Bottom: % of patients with MOCA < 26: Chi-Squared=0.0156,  $p=0.9922$ ; D) Cumulative distribution of Striatal and Putaminal binding potential, normalized to total BP in the 3 cohorts. E) Cumulative distribution of caudate and putamen volumes asymmetry. F) Cumulative distribution of amygdala volume asymmetry, normalized to total volume of gray and white matter in the 3 cohorts.
